# Supplementary material for: Spatiotemporal evolution of heterogeneous structures in agarose gels revealed by particle tracking
Source: Royal Society of Chemistry journal article supplement (doi:10.1039/d4sm01122h), 2024-12-03
Supplement: d4sm01122h1.pdf [file d4sm01122h1.pdf]

Supplementary information for

**Spatiotemporal Evolution of Heterogeneous Structures in  
Agarose Gels Revealed by Particle Tracking**

Naoya Yanagisawa<sup>1,†</sup>, Takemi Hara<sup>1,†</sup>, Miho Yanagisawa<sup>\*,1,2,3</sup>

<sup>1</sup> Komaba Institute for Science, Graduate School of Arts and Sciences, The University of Tokyo,  
3-8-1 Komaba, Meguro, Tokyo 153-8902, Japan

<sup>2</sup> Graduate School of Science, The University of Tokyo, Hongo 7-3-1, Bunkyo, Tokyo 113-0033,  
Japan

<sup>3</sup> Center for Complex Systems Biology, Universal Biology Institute, The University of Tokyo,  
Komaba 3-8-1, Meguro, Tokyo 153-8902, Japan

<sup>†</sup> H. T. and N. Y contributed equally to this paper.

\*Corresponding authors

E-mail: myanagisawa@g.ecc.u-tokyo.ac.jp

1.0 g/100mL

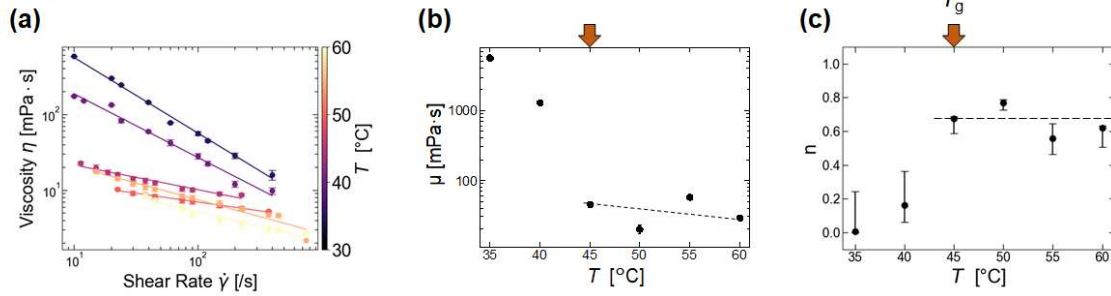

**Figure S1.** Temperature dependence of the solution viscosity for 1.0 g/100 mL agarose. (a) Shear rate  $\dot{\gamma}$  dependence on solution viscosity  $\eta$ . The error bars are standard errors (SE) in the time variation of viscosity at the constant  $\dot{\gamma}$ . Solid lines are the fitting with a power law, Eq. (1). (b, c) Temperature dependence of the viscosity coefficient  $\mu$  (b) and exponent  $n$  (c) derived by this fitting. Error bars and closed points indicate the conditions of fitting error  $R^2 > 0.9$  and maximum  $R^2$ , respectively. The red arrows indicate the temperature of 45 °C, where the temperature dependencies of  $\mu$  and  $n$  change during the cooling process. The dotted and broken lines show the exponential fitting and the average  $n$  value for  $T \geq 45$  °C, respectively.

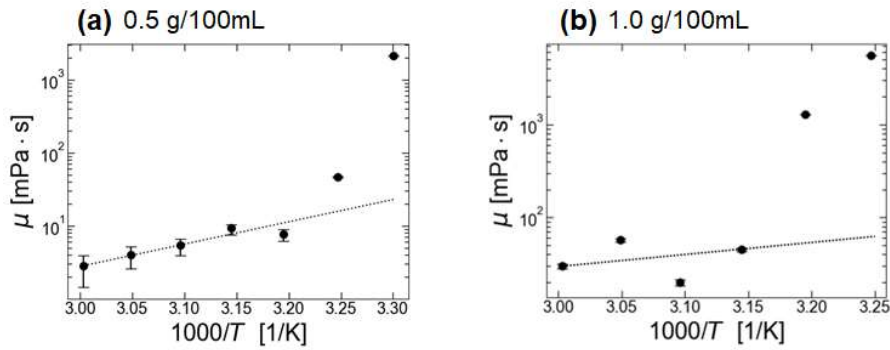

**Figure S2.** Temperature dependence of the viscosity coefficient  $\mu$  for (a) 0.5 g/ 100 mL and (b) 1.0 g/ 100 mL agarose solutions. The dotted lines in (a) and (b) show the exponential fits in the region of  $1000/T \leq 3.2$  and  $3.15$  K<sup>-1</sup>, respectively.

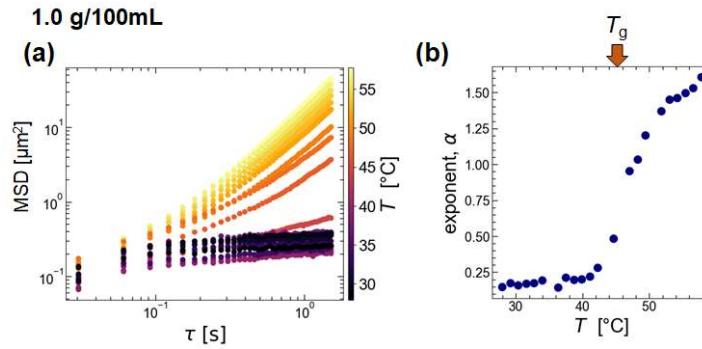

**Figure S3.** Colloidal diffusion in a 1.0 g/100 mL agarose solution. (a) Mean square displacement (MSD) of colloids during a slow quench from 80 °C to 25 °C at a rate of 0.3 °C/min. (b) The exponent  $\alpha$ , derived from the fitting with  $\text{MSD} \sim \tau^\alpha$  over the entire time scale (0.03~2 sec), is plotted against  $T$ . The red arrow indicates  $T_g = 45$  °C.

#### Fast quench to various quenching temperatures, $T_q$

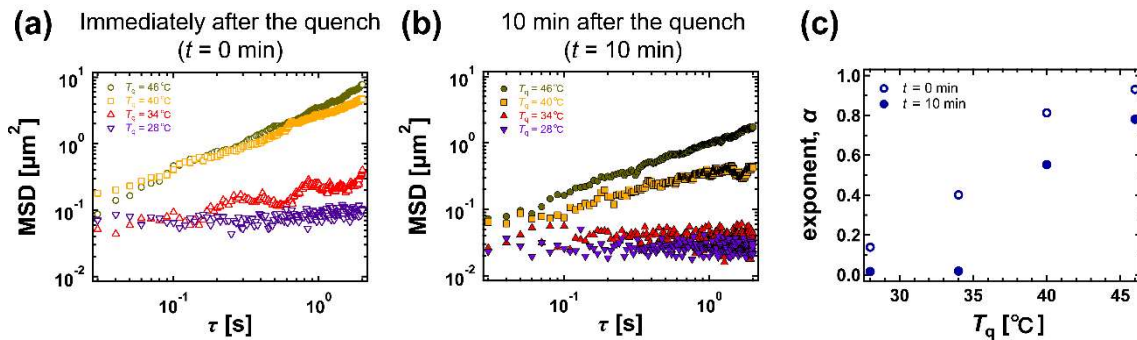

**Figure S4.** Colloidal diffusion in a 0.5 g/100 mL agarose solution after rapid quenching to various temperatures,  $T_q$  (28, 34, 40, 46 °C) above and below  $T_g$  (= 40 °C) and  $T_p$  (= 35 °C). (a, b) Mean square displacement (MSD) of multiple colloids immediately after the quench (a,  $t = 0$  min) and 10 min after (b,  $t = 10$  min). The color indicates different  $T_q$  values:  $T_q = 28$  (purple), 34 (red), 40 (yellow), 46 °C (green). (c) From the fitting of the  $\text{MSD} \sim \tau^\alpha$  over the entire time scale (0.03~2 sec), the exponent  $\alpha$  is plotted against  $T_q$ . The open blue and closed circles indicate the  $\alpha$  values at  $t = 0$  min and 10 min, respectively.

0.5 g/100mL agarose

Fast quench to various quenching temperatures,  $T_q$

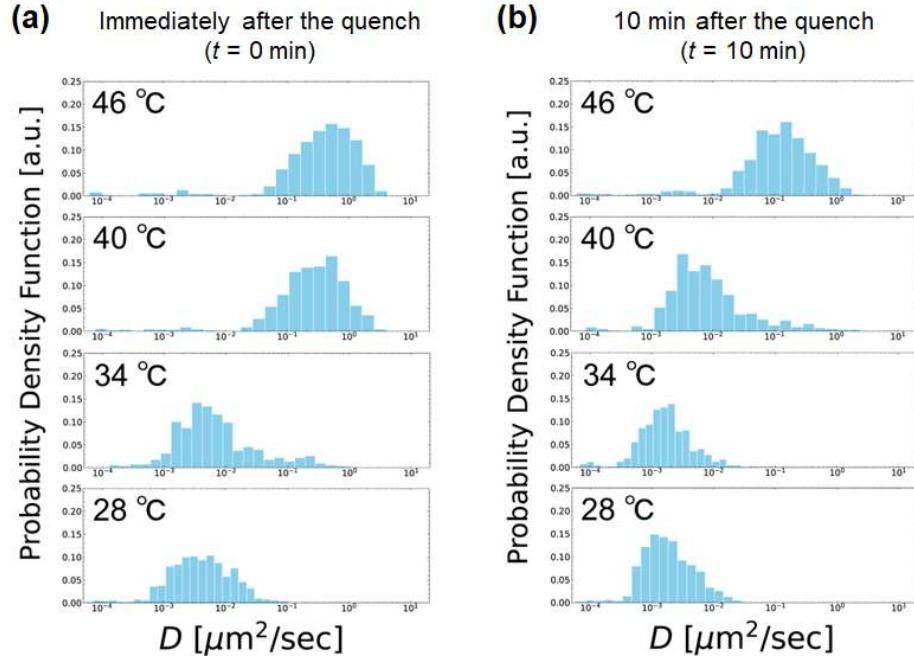

**Figure S5.** Histogram of time-averaged  $D$  obtained from MSD (Fig. S4) with  $\tau \sim 1.0$  s (a) immediately after the fast quench from 80 °C to various  $T_q$  (28, 34, 40, 46 °C) and (b) 10 minutes after the quench.

Constant  $T = T_g$  ( $\sim 40$  °C) for 0.5 g/100mL agarose

$\tau = 1.0$  sec

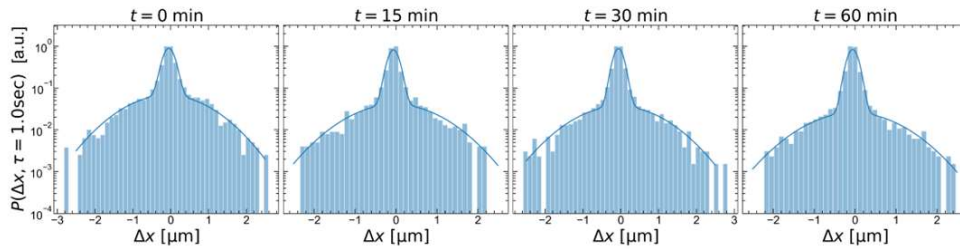

**Figure S6.** Van Hove correlation function,  $P$ , at a lag time of  $\tau = 1.0$  s. The temperature is maintained to be 40 °C ( $\sim T_g$ ) after the slow quench from 80 °C. The solid line shows the fitting line with the double Gaussian distribution. The number of data points is approximately 10,000.

**1.0 g/100mL agarose,  $\tau = 0.5$  sec**

(a) Slow quench

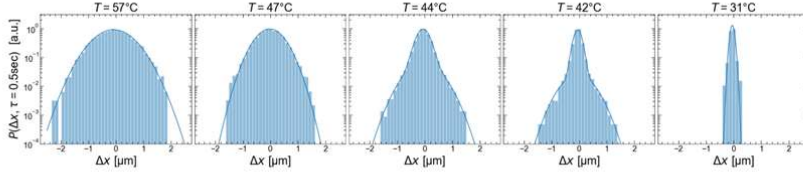

(b)

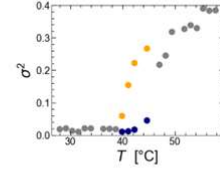

(c) Constant  $T = 45$  °C ( $\sim T_g$ )

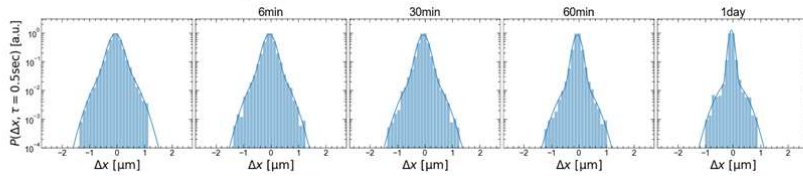

(d)

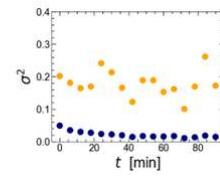

**Figure S7.** (a, c) Van Hove correlation function,  $P$ , at a lag time of  $\tau = 0.5$  sec for agarose 1.0 g/100 mL with  $T_g = 45$  °C and  $T_p = 40$  °C. The temperature is regulated as (a) a slow quench from 80 to 29 °C ( $< T_p$ ) with 0.3 °C/min or (c) maintained to be 45 °C ( $= T_g$ ). (b, d) Temperature and time dependence of the distribution variance  $\sigma^2$  obtained from their fitting in (a, c) using either the single (gray) or double (orange and blue) Gaussian distribution. The number of data points is (a-d) 7,000–12,000.

**1.0 g/100mL agarose,  $\tau = 1.0$  sec**

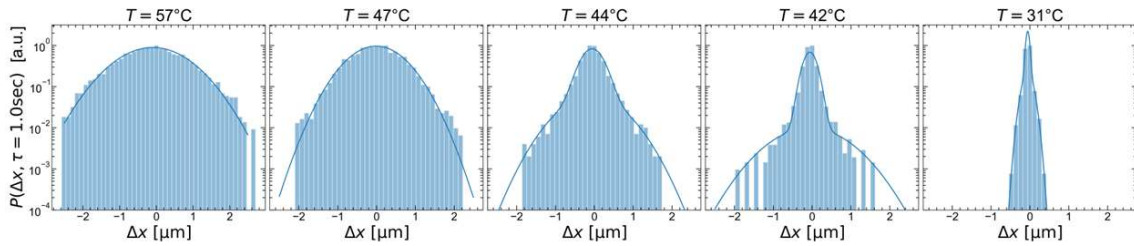

**Figure S8.** Van Hove correlation function,  $P$ , at a lag time of  $\tau = 1.0$  s for agarose 1.0 g/100 mL with  $T_g = 45$  °C and  $T_p = 40$  °C. The temperature is regulated as a slow quench from 80 to 29 °C ( $< T_p$ ) with 0.3 °C/min. The solid line shows the fitting line by using the single ( $T > T_g$  and  $T < T_p$ ) or double ( $T_p \leq T \leq T_g$ ) Gaussian distribution. The number of data points is 3,500–6,000.
